# Supplementary material
Source: Elsevier journal article supplement (https://www.sciencedirect.com/science/article/pii/S2603924922000040)
Supplement: mmc1 [file S2603924922000040:mmc1.docx]

**Apéndice A**

**Tabla A.1**. Parámetros analíticos de los pacientes

|  | **Total**  (N=1.018) | **Grupo 1**  (N=354) | **Grupo 2**  (N=326) | **Grupo 3**  (N=338) | **p a,b** |
| --- | --- | --- | --- | --- | --- |
| Parámetros analíticos, media (DE) |  |  |  |  |  |
| Triglicéridos, mg/dL | 135,7 (123,5) | 153,7 (187,7) | 131,5 (65,1) | 121,1 (67,4) | pglobal < 0,001  pG1-G2 = 0,041  pG1-G3 < 0,001  pG2-G3 = 0,007 |
| Colesterol Total, mg/dL | 155,07 (43,81) | 168,84 (46,83) | 155,23 (45,71) | 140,69 (32,92) | pglobal < 0,001  pG1-G2 < 0,001  pG1-G3 < 0,001  pG2-G3 < 0,001 |
| Colesterol LDL, mg/dL | 86,6 (36,6) | 101,1 (37,9) | 87,4 (39,6) | 71,0 (23,9) | pglobal < 0,001 pG1-G2 < 0,001  pG1-G3 < 0,001  pG2-G3 < 0,001 |
| Colesterol HDL, mg/dL | 43,5 (12,5) | 41,1 (12,1) | 42,7 (11,9) | 46,9 (12,8) | pglobal < 0,001  pG1-G3 < 0,001  pG2-G3 < 0,001 |
| Hierro, µmol/L | 13,6 (6,3) | 12,1 (6,9) | 14,1 (5,8) | 15,0 (5,6) | pglobal = <0,001  pG1-G2 = 0,003  pG1-G3 < 0,001 |
| Ferritina, ng/mL | 195,4 (184,3) | 203,3 (201,8) | 210,2 (199,3) | 168,0 (133,8) | pglobal = 0,283 |
| Saturación transferrina, % | 22,3 (10,1) | 19,3 (10,3) | 24,1 (9,6) | 25,6 (8,9) | pglobal < 0,001  pG1-G2 < 0,001  pG1-G3 < 0,001 |
| Hemoglobina, g/L | 141,3 (16,5) | 139,3 (17,6) | 142,2 (16,5) | 142,5 (15,1) | pglobal = 0,014  pG1-G2 = 0,010  pG1-G3 = 0,015 |
| HbA1c, % | 6,2 (1,2) | 6,2 (1,4) | 6,1 (1,1) | 6,2 (0,9) | pglobal = 0,140 |
| Albúmina, g/L | 41,2 (4,7) | 39,4 (4,3) | 42,3 (4,3) | 42,3 (4,9) | pglobal < 0,001 pG1-G2 < 0,001  pG1-G3 < 0,001 |
| Creatinina, µmol/L | 85,0 (46,3) | 86,7 (63,2) | 83,8 (38,4) | 84,4 (28,7) | pglobal = 0,661 |
| Urea, mmol/L;mEq/L | 7,1 (3,0) | 7,3 (3,6) | 7,0 (2,4) | 7,0 (2,7) | pglobal = 0,856 |
| Sodio, mmol/L;mEq/L | 140,3 (2,8) | 139,4 (2,7) | 140,5 (2,6) | 141,0 (2,7) | pglobal < 0,001  pG1-G2 < 0,001  pG1-G3 < 0,001  pG2-G3 = 0,005 |
| Potasio, mmol/L;mEq/L | 4,4 (0,4) | 4,2 (0,5) | 4,3 (0,5) | 4,5 (0,4) | pglobal < 0,001  pG1-G2 = 0,002  pG1-G3 < 0,001  pG2-G3 < 0,001 |
| Función renal, media (DE) |  |  |  |  |  |
| Cockroft-Gault-corregido, mL/min/1,73 m2 | 95,4 (35,3) | 93,8 (38,3) | 97,9 (33,7) | 94,6 (33,4) | pglobal = 0,143 |
| MDRD-4, mL/min/1,73 m2 | 88,9 (25,8) | 89,6 (28,2) | 90,3 (25,1) | 86,9 (23,7) | pglobal = 0,254 |

DE, desviación estándar; LDL (del inglés, lipoproteína de baja densidad); HDL (del inglés, lipoproteína de alta densidad; HbA1c, hemoglobina glicosilada

a A parte de todos los valores p globales, para facilitar la comprensión de la tabla, solo se presentan los valores p entre grupos que hayan sido estadísticamente significativos.

b Las comparaciones múltiples (pglobal) se han realizado con la prueba Kruskal-Wallis, mientras que las comparaciones 2 a 2 (en caso de pglobal < 0,05) con la prueba U de Mann-Whitney.

**Tabla A.2**. Exploraciones complementarias

|  | **Total**  (N=1.018) | **Grupo 1**  (N=354) | **Grupo 2**  (N=326) | **Grupo 3**  (N=338) | **p a,b** |
| --- | --- | --- | --- | --- | --- |
| Fracción de eyección, media % (DE) | 56,4 (9,9) | 55,6 (10,5) | 56,2 (9,4) | 57,4 (9,6) | pglobal = 0,025  pG1-G3 = 0,013  pG2-G3 = 0,033 |
| Categorización FEVI, n (%) |  |  |  |  | pglobal = 0,611 |
| ≤40% | 93 (9,1) | 36 (10,2) | 26 (8,0) | 31 (9,2) |  |
| >40% | 924 (90,9) | 318 (89,8) | 300 (92,0) | 306 (90,8) |  |
| Hipertrofia ventricular  izquierda, n (%) |  |  |  |  | pglobal = 0,018 pG1-G2 = 0,006 |
| Si | 447 (43,9) | 176 (49,7) | 128 (39,3) | 143 (42,3) |  |
| No | 571 (56,1) | 178 (50,3) | 198 (60,7) | 195 (57,7) |  |
| Ritmo sinusal, n (%) |  |  |  |  | pglobal = 0,206 |
| Si | 993 (97,5) | 344 (97,2) | 322 (98,8) | 327 (96,7) |  |
| No | 25 (2,5) | 10 (2,8) | 4 (1,2) | 11 (3,3) |  |
| Complejo QRS, n (%) |  |  |  |  | pglobal = 0,004 pG1-G2 = 0,003  pG1-G3 = 0,018 |
| Estrecho | 950 (93,3) | 318 (89,8) | 312 (95,7) | 320 (94,7) |  |
| Ancho | 68 (6,7) | 36 (10,2) | 14 (4,3) | 18 (5,3) |  |

DE, desviación estándar; FEVI, fracción de eyección del ventrículo izquierdo

a A parte de todos los valores p globales, para facilitar la comprensión de la tabla, solo se presentan los valores p entre grupos que hayan sido estadísticamente significativos.

b Las comparaciones múltiples (pglobal) se han realizado con la prueba Kruskal-Wallis para variables cuantitativas y prueba Chi-cuadrado para variables categóricas. Las comparaciones 2 a 2 (en caso de pglobal < 0,05) se han llevado a cabo con la prueba U de Mann-Whitney para variables cuantitativas y prueba Chi-cuadrado para variables categóricas.

**Tabla A.3**. Factores asociados a la prescripción/completitud de un programa de rehabilitación cardíaca

|  | **Total (Grupos 1, 2 y 3)** | | | **Grupo 1** | | | **Grupo 2** | | |
| --- | --- | --- | --- | --- | --- | --- | --- | --- | --- |
|  | **Sí**  (n=396) | **No**  (n=437) | **p** a | **Sí**  (n=122) | **No**  (n=158) | **p** a | **Sí**  (n=149) | **No**  (n=114) | **p** a |
| Edad, media años (DE) | 59,5 (9,5) | 66,6 (13,1) | < 0,001 | 60,1 (9,7) | 68,6 (13,7) | < 0,001 | 58,4 (9,5) | 65,7 (12,9) | < 0,001 |
| Sexo, n (%) |  |  | 0,026 |  |  | 0,181 |  |  | 0,574 |
| Masculino | 325 (82,1) | 331 (75,7) |  | 100 (82,0) | 119 (75,3) |  | 123 (82,6) | 91 (79,8) |  |
| Femenino | 71 (17,9) | 106 (24,3) |  | 22 (18,0) | 39 (24,7) |  | 26 (17,4) | 23 (20,2) |  |
| Situación laboral, n (%) |  |  | < 0,001 |  |  | 0,001 |  |  | 0,002 |
| Ocupado | 212 (53,5) | 129 (29,5) |  | 63 (51,6) | 46 (29,1) |  | 83 (55,7) | 39 (34,2) |  |
| Parado | 34 (8,6) | 26 (5,9) |  | 11 (9,0) | 8 (5,1) |  | 16 (10,7) | 10 (8,8) |  |
| Jubilado | 118 (29,8) | 201 (46,0) |  | 36 (29,5) | 81 (51,3) |  | 42 (28,2) | 44 (38,6) |  |
| Pensionista | 15 (3,8) | 38 (8,7) |  | 8 (6,6) | 14 (8,9) |  | 2 (1,3) | 10 (8,8) |  |
| Labores de hogar | 13 (3,3) | 35 (8,0) |  | 4 (3,3) | 8 (5,1) |  | 5 (3,4) | 8 (7,0) |  |
| Invalidez permanente | 3 (0,8) | 7 (1,6) |  | 0 (0,0) | 1 (0,6) |  | 1 (0,7) | 2 (1,8) |  |
| Estudiante | 1 (0,3) | 1 (0,2) |  | 0 (0,0) | 0 (0,0) |  | 0 (0,0) | 1 (0,9) |  |
| Peso, media Kg (DE) | 80,8 (13,7) | 79,4 (14,3) | 0,148 | 79,2 (14,4) | 78,0 (15,6) | 0,379 | 81,3 (12,1) | 79,7 (13,4) | 0,369 |
| Talla, media cm (DE) | 169,4 (8,5) | 167,4 (8,8) | < 0,001 | 169,4 (8,0) | 166,3 (8,9) | 0,008 | 169,8 (8,3) | 168,2 (8,8) | 0,146 |
| IMC, media Kg/m2 (DE) | 28,1 (4,1) | 28,3 (4,4) | 0,691 | 27,5 (3,9) | 28,1 (4,4) | 0,285 | 28,2 (4,2) | 28,1 (4,1) | 0,839 |
| Perímetro abdominal, media cm (DE) | 100,6 (10,3) | 100,7 (12,7) | 0,994 | 99,5 (10,5) | 101,5 (12,7) | 0,093 | 101,0 (9,8) | 99,3 (12,0) | 0,223 |
| PAS, media mmHg (DE) | 126,7 (17,4) | 130,7 (19,5) | 0,009 | 124,6 (18,9) | 124,8 (18,8) | 0,830 | 124,0 (16,2) | 133,1 (19,8) | < 0,001 |
| PAD, media mmHg (DE) | 75,5 (10,3) | 74,7 (11,0) | 0,223 | 76,0 (11,4) | 71,9 (11,7) | 0,004 | 74,5 (10,1) | 76,0 (9,8) | 0,333 |
| Frecuencia cardiaca, media ppm (DE) | 66,1 (11,8) | 69,1 (12,3) | < 0,001 | 68,0 (12,6) | 69,7 (11,8) | 0,071 | 66,6 (11,5) | 69,2 (12,8) | 0,064 |
| Historial tabáquico, n (%) |  |  | 0,006 |  |  |  |  |  | 0,788 |
| Nunca fumador | 92 (23,2) | 144 (33,0) |  | 28 (23,0) | 58 (36,7) | 0,017 | 40 (26,8) | 35 (30,7) |  |
| Exfumador | 214 (54,0) | 215 (49,2) |  | 44 (36,1) | 57 (36,1) |  | 86 (57,7) | 62 (54,4) |  |
| Fumador | 90 (22,7) | 78 (17,8) |  | 50 (41,0) | 43 (27,2) |  | 23 (15,4) | 17 (14,9) |  |
| Consumo de alcohol, n (%) |  |  | 0,974 |  |  | 0,075 |  |  | 0,079 |
| Sí | 91 (23,0) | 100 (22,9) |  | 42 (34,4%) | 39 (24,7%) |  | 27 (18,1) | 31 (27,2) |  |
| No | 305 (77,0) | 337 (77,1) |  | 80 (65,6) | 119 (75,3) |  | 122 (81,9) | 83 (72,8) |  |
| Ejercicio físico, n (%) |  |  | < 0,001 |  |  | 0,005 |  |  | 0,033 |
| No realiza ejercicio físico | 142 (35,9) | 248 (56,8) |  | 60 (49,2) | 104 (65,8) |  | 55 (36,9) | 57 (50,0) |  |
| Al menos 30 minutos de ejercicio diario 5 días a la semana | 254 (64,1) | 189 (43,2) |  | 62 (50,8) | 54 (34,2) |  | 94 (63,1) | 57 (50,0) |  |
| Dieta, n (%) |  |  | 0,011 |  |  | 0,309 |  |  | 0,008 |
| Sí | 251 (63,4) | 239 (54,7) |  | 52 (42,6) | 77 (48,7) |  | 106 (71,1) | 63 (55,3) |  |
| No | 145 (36,6) | 198 (45,3) |  | 70 (57,4) | 81 (51,3) |  | 43 (28,9) | 51 (44,7) |  |
| Antecedentes familiares, n (%) |  |  | 0,036 |  |  | 0,676 |  |  | 0,190 |
| Sí | 108 (27,3) | 92 (21,1) |  | 26 (21,3) | 37 (23,4) |  | 39 (26,2) | 22 (19,3) |  |
| No | 288 (72,7) | 345 (78,9) |  | 96 (78,7) | 121 (76,6) |  | 110 (73,8) | 92 (80,7) |  |
| Antecedentes personales  de cirugía y/u otros procedimientos, n (%) |  |  | 0,020 |  |  | 0,037 |  |  | 0,051 |
| Sí | 54 (13,6) | 86 (19,7) |  | 14 (11,5) | 33 (20,9) |  | 14 (9,4) | 20 (17,5) |  |
| No | 342 (86,4) | 351 (80,3) |  | 108 (88,5) | 125 (79,1) |  | 135 (90,6) | 94 (82,5) |  |
| Tipo de antecedente personal, n (%) | n=54 | n=86 |  | n=14 | n=33 |  | n=14 | n=20 |  |
| Intervención coronaria percutánea | 46 (85,2) | 67 (77,9) | 0,288 | 14 (100,0) | 21 (63,6) | 0,009 | 11 (78,6) | 19 (95,0) | 0,143 |
| Cirugía de bypass de la arteria coronaria | 5 (9,3) | 20 (23,3) | 0,035 | 0 (0,0) | 9 (27,3) | 0,030 | 2 (14,3) | 2 (10,0) | 0,703 |
| Otros relacionados con patologías cardiacas | 9 (16,7) | 9 (10,5) | 0,286 | 0 (0,0) | 7 (21,2) | 0,062 | 1 (7,1) | 0 (0,0) | 0,225 |
| Comorbilidades, n (%) |  |  |  |  |  |  |  |  |  |
| Enfermedad cardiovascular | 89 (22,5) | 131 (30,0) | 0,014 | 26 (21,3) | 52 (32,9) | 0,032 | 29 (19,5) | 32 (28,1) | 0,101 |
| Diabetes mellitus | 81 (20,5) | 156 (35,7) | < 0,001 | 27 (22,1) | 46 (29,1) | 0,187 | 31 (20,8) | 44 (38,6) | 0,002 |
| Hipertensión arterial | 247 (62,4) | 310 (70,9) | 0,009 | 73 (59,8) | 108 (68,4) | 0,139 | 88 (59,1) | 81 (71,1) | 0,044 |
| Dislipemia | 263 (66,4) | 292 (66,8) | 0,902 | 79 (64,8) | 112 (70,9) | 0,275 | 104 (69,8) | 75 (65,8) | 0,490 |
| Enfermedad cerebrovascular | 13 (3,3) | 29 (6,6) | 0,027 | 7 (5,7) | 14 (8,9) | 0,325 | 4 (2,7) | 4 (3,5) | 0,700 |
| Nefropatía | 7 (1,8) | 26 (5,9) | 0,002 | 3 (2,5) | 8 (5,1) | 0,266 | 1 (0,7) | 9 (7,9) | 0,002 |
| Arteriopatía periférica | 21 (5,3) | 27 (6,2) | 0,588 | 8 (6,6) | 10 (6,3) | 0,938 | 6 (4,0) | 5 (4,4) | 0,885 |
| Retinopatía avanzada | 2 (0,5) | 7 (1,6) | 0,126 | 0 (0,0) | 4 (2,5) | 0,077 | 0 (0,0) | 1 (0,9) | 0,252 |
| Clasificación del evento, n (%) |  |  | 0,007 |  |  | 0,352 |  |  | 0,003 |
| Angina inestable | 61 (15,4) | 82 (18,8) |  | 11 (9,0) | 21 (13,3) |  | 28 (18,8) | 27 (23,7) |  |
| SCACEST | 206 (52,0) | 180 (41,2) |  | 64 (52,5) | 71 (44,9) |  | 78 (52,3) | 36 (31,6) |  |
| Especificación SCACEST |  |  | 0,232 | 64 (100,0) | 71 (100,0) | 0,451 | 78 (100,0) | 36 (100,0) | 0,310 |
| Con presencia de onda Q de necrosis residual | 130 (63,1) | 124 (68,9) |  | 45 (70,3) | 54 (76,1) |  | 49 (62,8) | 19 (52,8) |  |
| Sin presencia de onda Q de necrosis residual | 76 (36,9) | 56 (31,1) |  | 19 (29,7) | 17 (23,9) |  | 29 (37,2) | 17 (47,2) |  |
| SCASEST | 129 (32,6) | 175 (40,0) |  | 47 (38,5) | 66 (41,8) |  | 43 (28,9) | 51 (44,7) |  |
| Primer evento del paciente, n (%) |  |  | 0,022 |  |  | 0,146 |  |  | 0,268 |
| Sí | 344 (86,9) | 354 (81,0) |  | 100 (82,0) | 118 (74,7) |  | 129 (86,6) | 93 (81,6) |  |
| No | 52 (13,1) | 83 (19,0) |  | 22 (18,0) | 40 (25,3) |  | 20 (13,4) | 21 (18,4) |  |
| Número de eventos, media (DE) | 1,2 (0,6) | 1,5 (1,1) | 0,060 | 1,1 (0,5) | 1,7 (1,4) | 0,043 | 1,2 (0,4) | 1,5 (0,9) | 0,414 |
| Tipo de tratamiento, n (%) |  |  | 0,616 |  |  | 0,293 |  |  | 0,970 |
| Policomprimidos de 3 o más componentes (sin otros tratamientos) | 1 (0,3) | 0 (0,0) |  | 0 (0,0) | 0 (0,0) |  | - | - |  |
| Otros tratamientos (sin policomprimidos de 3 o más componentes) | 360 (90,9) | 402 (92,0) |  | 114 (93,4) | 152 (96,2) |  | 141 (94,6) | 108 (94,7) |  |
| Policomprimidos de 3 o más componentes + Otros tratamientos | 35 (8,8) | 35 (8,0) |  | 8 (6,6) | 6 (3,8) |  | 8 (5,4) | 6 (5,3) |  |
| Tratamiento con el que llega el paciente a la visita, n (%) (tratamiento que se mantiene, se retira o se cambia dosis) | n=273 | n=279 | 0,010 | - | - | - |  |  | 0,006 |
| Óptimo | 201 (73,6) | 177 (63,4) |  | - | - | - | 115 (77,2) | 70 (61,4) |  |
| No óptimo | 72 (26,4) | 102 (36,6) |  | - | - | - | 34 (22,8) | 44 (38,6) |  |
| Tratamiento que se le prescribe al paciente en la visita, n (%) (tratamiento que se mantiene, se añade o se cambia dosis) | n= 395 | n= 437 | < 0,001 |  |  | 0,005 |  |  | 0,002 |
| Óptimo | 317 (80,3) | 301 (68,9) |  | 108 (88,5) | 119 (75,3) |  | 121 (81,2) | 73 (64,0) |  |
| No óptimo | 78 (19,7) | 136 (31,1) |  | 14 (11,5) | 39 (24,7) |  | 28 (18,8) | 41 (36,0) |  |

DE, desviación estándar; IMC, índice de masa corporal; PAS, Presión arterial sistólica, PAD, Presión arterial diastólica; SCACEST, síndrome coronario agudo con elevación del segmento ST; SCASEST, síndrome coronario agudo sin elevación del segmento ST

a Las comparaciones entre grupos (PRC Sí vs No) se han realizado con la prueba T de Student o U de Mann-Whitney para variables cuantitativas y prueba Chi-cuadrado o test exacto de Fisher para variables categóricas

**Apéndice B**

**Listado completo de investigadores del grupo RECARIS**

El listado de investigadores que constituyen el grupo RECARIS es el siguiente:

Dr. Rafael Vicente Colman Llamozas (Clínica Colman, Cádiz); Dr. Juan Ramón Siles Rubio (Clínica del Río; Málaga); Dr. Francisco Torres Calvo (Clínica del Río; Málaga); Dra. María Rosa Fernández Olmo (Complejo Hospitalario de Jaén, Jaén); Dr. Javier Torres Llergo (Complejo Hospitalario de Jaén, Jaén); Dr. José Francisco Díaz Fernández (Hospital General Juan Ramón Jiménez, Huelva); Dra. Ana López Suárez (Hospital General Juan Ramón Jiménez, Huelva); Dr. Raúl López Aguilar (Hospital General Juan Ramón Jiménez, Huelva); Dr. Rafael Vázquez García (Hospital Puerta del Mar, Cádiz); Dr. Daniel Bartolomé Mateos (Hospital Puerta del Mar, Cádiz); Dr. Manuel Lagares Carballo (Hospital Puerta del Mar, Cádiz); Dr. Pablo Toledo Frias (Hospital Universitario San Cecilio, Granada); Dra. Susana Martínez Huertas (Hospital Universitario San Cecilio, Granada); Dra. Maria del Mar Martínez Quesada (Hospital Virgen Macarena, Sevilla); Dra. Rosario Cabrera (Hospital Virgen Macarena, Sevilla); Dra. Maria Eugenia Marquina de Padura (Hospital General de la Defensa de Zaragoza, Zaragoza); Dr. Javier Gracia Balaguer (Hospital General de la Defensa de Zaragoza, Zaragoza); Dra. María José Calpe Gil (Hospital Obispo Polanco de Teruel, Teruel); Dr. Sergio Nijensohn Berconsky (Hospital Obispo Polanco de Teruel, Teruel); Dr. Javiel Cuba Herrera (Hospital Universitario Insular de Gran Canaria, Las Palmas); Dra. Nelva Sosa González (Hospital Universitario Insular de Gran Canaria, Las Palmas); Dra. Maria Ramos López (Hospital Universitario Nuestra Señora de Candelaria, Santa Cruz de Tenerife); Dra. Patricia Couto Comba (Hospital Universitario Nuestra Señora de Candelaria, Santa Cruz de Tenerife); Dr. Javier Vara Manso (Complejo Asistencial Universitario de León, León); Dr. José Antonio Lastra Galán (Complejo Asistencial Universitario de León, León); Dra. Eva García Piney (Hospital Nuestra Señora de Sonsoles, Ávila); Dr. Carlos Alberto Lugo Godoy (Hospital Nuestra Señora de Sonsoles, Ávila); Dr. Pedro Rodríguez Ballestero (Hospital General Nuestra Señora del Prado, Toledo); Dr. Ángel Manuel Solloso Martínez (Hospital General Nuestra Señora del Prado, Toledo); Dra. Rut Andrea Riba (Hospital Clínic de Barcelona, Barcelona); Dr. Oriol De Diego Soler (Hospital Clínic de Barcelona, Barcelona); Dr. Francesc Xavier Garcia-Moll Marimon (Hospital de la Santa Creu i Sant Pau, Barcelona); Dr. Fernando Worner Diz (Hospital Universitari Arnau de Vilanova de Lleida, Lleida); Dra. Anna Bosch Gaya (Hospital Universitari Arnau de Vilanova de Lleida, Lleida); Dr. José Carlos Sánchez Salado (Hospital Universitari de Bellvitge, Barcelona); Dra. Victoria Lorente Tordera (Hospital Universitari de Bellvitge, Barcelona); Dr. Cosme García García (Hospital Universitari Germans Trias i Pujol de Badalona, Barcelona); Dr. Carlos Labata Salvador (Hospital Universitari Germans Trias i Pujol de Badalona, Barcelona); Dr. Carlos Antonio Aranda López (Hospital Infanta Cristina, Madrid); Dra. Mercedes Merchan Cuenda (Hospital Infanta Cristina, Madrid); Dra. Belén Alvarez Alvarez (Hospital Clínico Universitario de Santiago, A Coruña); Dra. Rosa Agra Bermejo (Hospital Clínico Universitario de Santiago, A Coruña); Dra. Marisol Bravo Amaro (Hospital Universitario Álvaro Cunqueiro, Pontevedra); Dr. Sergio Raposeiras Roubin (Hospital Universitario Álvaro Cunqueiro, Pontevedra); Dra. Raquel Marzoa Rivas (Hospital Universitario Arquitecto Marcide, A Coruña); Dr. Gabriel Sánchez Fernandez (Hospital Universitario Arquitecto Marcide, A Coruña); Dr. Diego Fernández Redondo (Hospital Universitario Montecelo, Pontevedra); Dra. Alba Guitian González (Hospital Universitario Montecelo, Pontevedra); Dra. Isabel Ruiz Zamora (Hospital San Pedro, La Rioja); Dr. Guillermo Pinillos Francia (Hospital San Pedro, La Rioja); Dr. David Crémer Luengos (Hospital Son Llatzer, Islas Baleares); Dr. Jorge Alvarez Rubio (Hospital Son Llatzer, Islas Baleares); Dr. Gaspar Melis (Hospital Universitari Son Espases, Islas Baleares); Dr. Onofre Caldes Llull (Hospital Universitari Son Espases, Islas Baleares); Dr. José Florit Martín (Hospital de la Zarzuela, Madrid); Dr. Santiago De Dios Pérez (Hospital de la Zarzuela, Madrid); Dr. Carlos Gutiérrez Landaluce (Hospital Universitario de Fuenlabrada, Madrid); Dr. Javier Alonso Belló (Hospital Universitario de Fuenlabrada, Madrid); Dr. Alberto Esteban Fernández (Hospital Universitario de Móstoles, Madrid); Dra. María de los Reyes Oliva Encabo (Hospital Universitario de Móstoles, Madrid); Dra. Raquel Campuzano Ruiz (Hospital Universitario Fundación Alcorcón, Madrid); Dr. Lorenzo Hernando Marrupe (Hospital Universitario Fundación Alcorcón, Madrid); Dr. Juan Ramón Rey Blas (Hospital Universitario La Paz, Madrid); Dr. Laura Peña Conde (Hospital Universitario La Paz, Madrid); Dr. Javier Ortega Marcos (Hospital Universitario Puerta de Hierro Majadahonda, Madrid); Dra. Susana Mingo Santos (Hospital Universitario Puerta de Hierro Majadahonda, Madrid); Dr. Victor Josep Girbes Ruíz (Consorcio Hospital General Universitario de Valencia, Valencia); Dr. Josep Lluís Melero Ferrer (Consorcio Hospital General Universitario de Valencia, Valencia); Dr. Joaquín Cànoves Femenia (Hospital Clínico Universitario de Valencia, Valencia); Dra. Clara Bonanad Lozano (Hospital Clínico Universitario de Valencia, Valencia); Dr. Pedro Morillas Blasco (Hospital General Universitario de Elche, Alicante); Dr. Manuel Jesús Gómez Martínez (Hospital General Universitario de Elche, Alicante); Dr. Alberto Cordero Fort (Hospital Universitario San Juan de Alicante, Alicante); Dr. Vicente Bertomeu González (Hospital Universitario San Juan de Alicante, Alicante); Dra. Maria Esther Recalde del Vigo (Hospital de Basurto, Bizkaia); Dra. Juana Umarán Sánchez (Hospital Galdakao-Usansolo, Bizkaia); Dra. María Angeles Eneriz Pérez (Hospital Galdakao-Usansolo, Bizkaia); Dra. Teresa Sola Moreno (Hospital Reina Sofía, Navarra); Dr. Angela Juez (Hospital Reina Sofía, Navarra); Dr. José Miguel Vegas Valle (Hospital de Cabueñes, Asturias); Dr. José Manuel García Ruiz (Hospital de Cabueñes, Asturias); Dr. Antonio Tello Montoliu (Hospital Clínico Universitario Virgen de la Arrixaca, Murcia); Dr. Domingo Pascual Figal (Hospital Clínico Universitario Virgen de la Arrixaca, Murcia); Dr. Pedro García Urruticoechea (Hospital General Universitario Santa Lucia, Murcia); Dr. José Garcia Gomez (Hospital General Universitario Santa Lucia, Murcia).
